# Supplementary material for: Surface covalent sulfur enriching Ni active sites of Ni3S2 nanoparticles for efficient oxygen evolution
Source: Royal Society of Chemistry journal article supplement (doi:10.1039/d0nj06064j), 2021-01-01
Supplement: d0nj06064j1.pdf [file d0nj06064j1.pdf]

## **Supporting Information**

### **Surface covalent sulfur enriching Ni active sites of Ni<sub>3</sub>S<sub>2</sub> nanoparticles for efficient oxygen evolution**

Bei Zhang, Jiahao Zhang, Haoxuan Zhang, Hao Jiang\*, Chunzhong Li

*Key Laboratory for Ultrafine Materials of Ministry of Education, Shanghai Engineering Research Center of Hierarchical Nanomaterials, School of Materials Science and Engineering, School of Chemical Engineering, East China University of Science and Technology, Shanghai 200237, China*

---

\* Corresponding author.  
Email address: [jianghao@ecust.edu.cn](mailto:jianghao@ecust.edu.cn) (Prof. H. Jiang).

## **Part I Experimental Section**

### **1.1 Synthesis of the Ni<sub>3</sub>S<sub>2</sub> nanoparticles**

Prior to use, commercial NF in size of 6 mm × 5 mm × 0.3 mm was soaked in 3 M HCl under ultrasound to wash the surface impurities. In a typical synthesis, a piece of fresh NF and 4 mg of sulfur powder were enfolded by aluminum foil, in which the surface of NF was fully covered by the powder. Then, the sealed foil was put into a 2-ml vial and transferred into a glove box filled with Ar atmosphere. After that, the vial was heated to 200 °C for 20 min and subsequently cooled down to room temperature followed by washing treatment using CS<sub>2</sub>, ethanol and deionized water to remove the residual. After dried at 60 °C for 12 h, the sample labeled as Ni<sub>3</sub>S<sub>2</sub>-200 was collected for structural characterization and performance evaluation. For reference, the melting temperature was altered to 180 °C and 220 °C, respectively, to obtain the Ni<sub>3</sub>S<sub>2</sub>-180 and Ni<sub>3</sub>S<sub>2</sub>-220 samples without varying other conditions.

### **1.2 Characterization**

The crystalline structure of the resulting samples was investigated by powder X-ray diffraction (XRD, Rigaku D/Max 2550, Cu K $\alpha$  radiation) at a scan rate of 1° min<sup>-1</sup>. Morphological information was collected by field-emission scanning electron microscopy (FESEM, Hitachi, S-4800) with an X-ray energy dispersive spectrometer (EDS) and transmission electron microscopy (TEM, JEOL-2100F) at an accelerating voltage of 200 kV. Surface chemical information was recorded using an ESCALAB 250Xi X-ray photoelectron spectrometer (XPS) at a pass energy of 40 eV with an Al K $\alpha$  X-ray source. The surface sulfur content of the resulting samples was characterized by an Agilent 7700 inductive couple plasma mass spectrometer (ICP-MS).

### **1.3 Electrochemical Measurements**

OER performances were assessed by CHI 760E electrochemical workstation connected with a typical three-electrode configuration, in which graphite, saturated Ag/AgCl and resulting sample were applied as a counter electrode, reference electrode and self-supported working electrode, respectively, in 1 M KOH aqueous electrolyte. To prepare RuO<sub>2</sub> electrode for comparison, 5 mg of RuO<sub>2</sub> powder, 0.42 mL of distilled water, 0.5 mL of ethanol and 80  $\mu$ L of

5 wt% Nafion solution were mixed by sufficient sonication to obtain a well-dispersed ink. Subsequently, the ink was coated onto NF with a mass loading of 2.0 mg cm<sup>-2</sup>. All the data was compensated with 95% *iR* drop and calibrated to reversible hydrogen electrode (RHE) based on the following equation:

$$E_{RHE} = E_{Ag/AgCl} + 0.1976 + 0.0591 \times pH$$

OER polarization curves were recorded by linear sweep voltammetry (LSV) technique at a scan rate of 5 mV s<sup>-1</sup>. Tafel slopes (*b*) were calculated by fitting the Tafel plots:

$$\eta = b \log(j) + a$$

where  $\eta$  is the overpotential, and  $j$  is the corresponding current density. Electrochemical impedance spectroscopy (EIS) was tested by an Autolab PGSTAT302N electrochemical workstation in the frequency from 0.01 Hz to 100 kHz at the potential of 1.52 V. Catalytic stability was evaluated using chronopotentiometry (CP) at a current density of 100 mA cm<sup>-2</sup>. Electrochemically active surface area (ECSA) was calculated according to the following equation:

$$ECSA = C_{DL} / C_S$$

where  $C_{DL}$  is the electrochemical double layer capacitance,  $C_S$  is the specific capacitance. The  $C_{DL}$  was measured by a cyclic voltammetry (CV) method at non-Faradic potential of 5 to 200 mV s<sup>-1</sup>. The specific capacitance of Ni is 25  $\mu$ F cm<sup>-2</sup> in alkaline media. Turnover frequency (TOF) was estimated by the following equation:

$$TOF = (J \times A) / (4 \times n \times F)$$

where  $J$  is the current density obtained from polarization curves,  $A$  is the geometric area of the electrode,  $F$  is the Faraday constant (96485 C mol<sup>-1</sup>), and  $n$  is the mole number of active sites of the electrode.

## Part II Supporting Figures

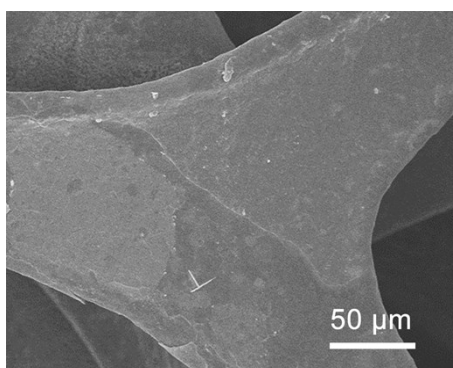

**Fig. S1** Low-magnification SEM image of the Ni<sub>3</sub>S<sub>2</sub>-200 sample.

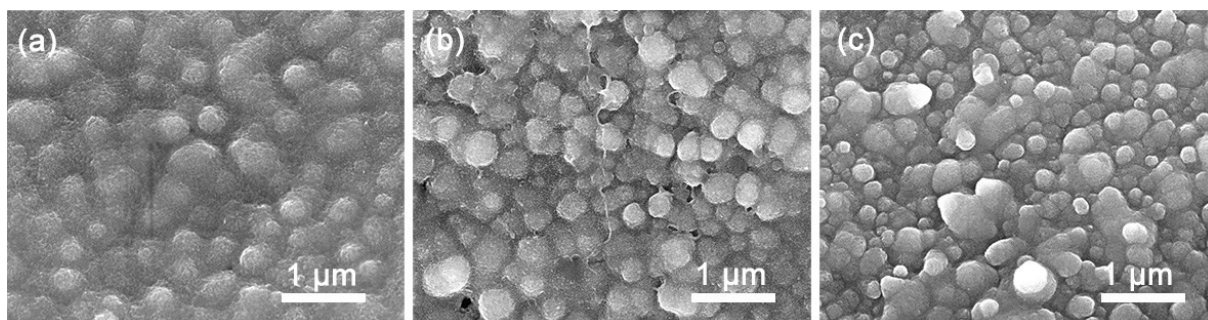

**Fig. S2** SEM images of the (a) Ni<sub>3</sub>S<sub>2</sub>-180, (b) Ni<sub>3</sub>S<sub>2</sub>-200 and (c) Ni<sub>3</sub>S<sub>2</sub>-220 samples.

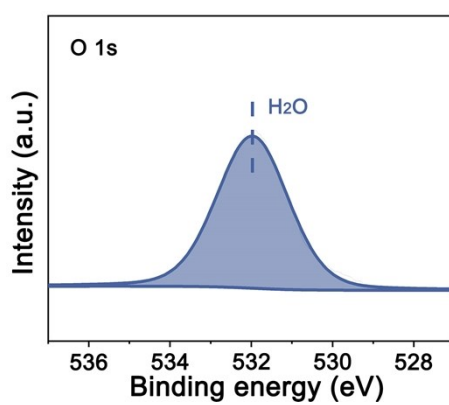

**Fig. S3** XPS spectrum of O 1s for the Ni<sub>3</sub>S<sub>2</sub>-200 sample.

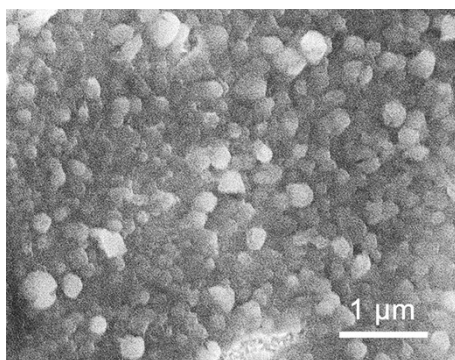

**Fig. S4** SEM image of the Ni<sub>3</sub>S<sub>2</sub>-200 sample after OER.

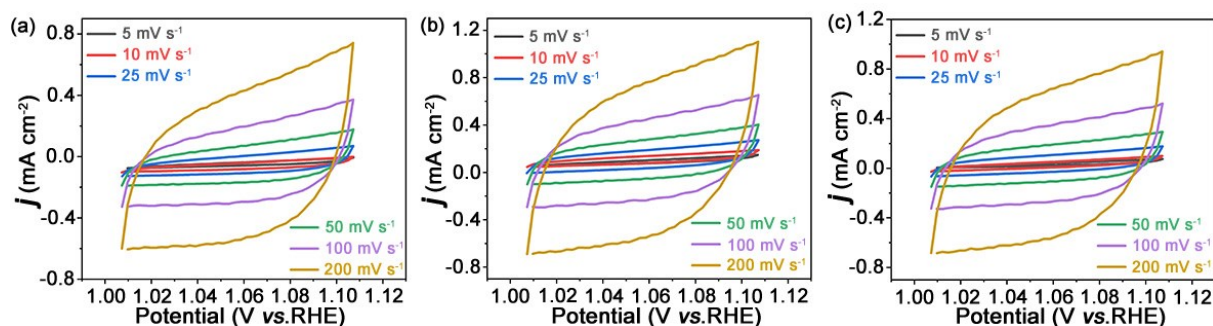

**Fig. S5** Cyclic voltammogram curves of the (a) Ni<sub>3</sub>S<sub>2</sub>-180, (b) Ni<sub>3</sub>S<sub>2</sub>-200 and (c) Ni<sub>3</sub>S<sub>2</sub>-220 samples in non-faradic potential range at different sweep rates.

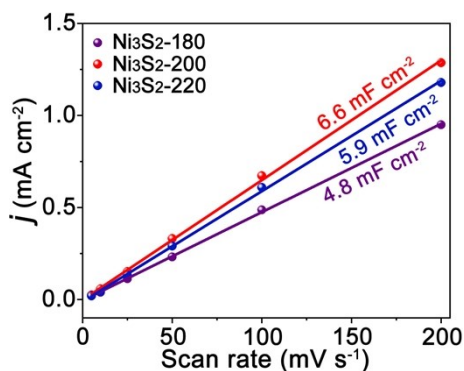

**Fig. S6** Double-layer capacitances of the Ni<sub>3</sub>S<sub>2</sub>-180, Ni<sub>3</sub>S<sub>2</sub>-200 and Ni<sub>3</sub>S<sub>2</sub>-220 samples.

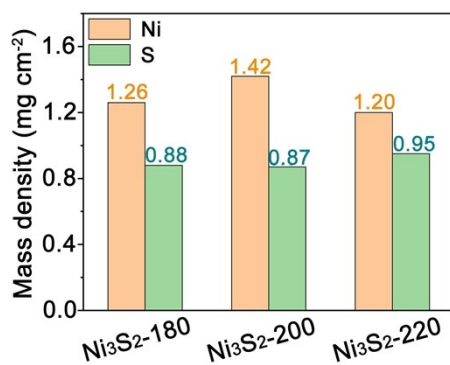

**Fig. S7** Mass densities of Ni and S elements in the Ni<sub>3</sub>S<sub>2</sub> samples. S content is based on ICP-MS results, whilst Ni content is estimated from the following formula:

$$m_{\text{Ni}} = m_{\text{S}} \times M_{\text{Ni}} / (M_{\text{S}} \times R_{\text{S/Ni}})$$

Where  $R_{\text{S/Ni}}$  is the ratio of atomic S and Ni based on XPS data as shown in **Table S3**, and  $M_{\text{S}}$  and  $M_{\text{Ni}}$  are the molecular mass of S and Ni, respectively.

## Part III Supporting Tables

**Table S1** OER performance Comparison of the reported Ni<sub>3</sub>S<sub>2</sub> electrocatalysts in 1 M KOH.

| Electrocatalysts                                     | <i>J</i><br>(mA cm <sup>-2</sup> ) | <i>η</i><br>(mV)         | Tafel slope<br>(mV dec <sup>-1</sup> ) | Reference        |
|------------------------------------------------------|------------------------------------|--------------------------|----------------------------------------|------------------|
| Ni <sub>3</sub> S <sub>2</sub> @Co(OH) <sub>2</sub>  | 100                                | 440                      | 90.7                                   | S1               |
| Ni <sub>3</sub> S <sub>2</sub> @NF                   | 100                                | 293                      | 60.5                                   | S2               |
| Fe-Ni <sub>3</sub> S <sub>2</sub> NS                 | 10                                 | 295                      | 71                                     | S3               |
| Ni <sub>3</sub> S <sub>2</sub>  P                    | 100                                | 420                      | 224                                    | S4               |
| Ni <sub>3</sub> S <sub>2</sub> @N-C                  | 10                                 | 271                      | 99                                     | S5               |
| Ni <sub>3</sub> S <sub>2</sub> -CeO <sub>2</sub> /NF | 100                                | 370                      | 146                                    | S6               |
| Mo-Ni <sub>3</sub> S <sub>2</sub> NS                 | 10                                 | 260                      | 85                                     | S7               |
| <b>Ni<sub>3</sub>S<sub>2</sub>-200</b>               | <b>10</b><br><b>100</b>            | <b>242</b><br><b>290</b> | <b>40</b>                              | <b>This work</b> |

**Table S2** Geometric values of the electronic elements extracted from the electrical equivalent circuit model.

| Electrocatalysts                    | R <sub>s</sub> (Ω) | R <sub>ct</sub> (Ω) | C <sub>dl</sub> (mF) |
|-------------------------------------|--------------------|---------------------|----------------------|
| Ni <sub>3</sub> S <sub>2</sub> -180 | 8.635              | 28.098              | 0.715                |
| Ni <sub>3</sub> S <sub>2</sub> -200 | 10.0913            | 21.767              | 0.742                |
| Ni <sub>3</sub> S <sub>2</sub> -220 | 10.185             | 25.879              | 0.755                |

R<sub>s</sub> is related to the series resistance. R<sub>ct</sub> denotes the charge transfer resistance. C<sub>dl</sub> is the constant phase angle element, representing the double layer capacitance.

**Table S3** Comparisons of Ni, S content in the Ni<sub>3</sub>S<sub>2</sub> electrocatalysts based on XPS results.

| <b>Electrocatalysts</b>             | <b>Ni content (Atomic%)</b> | <b>S content (Atomic%)</b> |
|-------------------------------------|-----------------------------|----------------------------|
| Ni <sub>3</sub> S <sub>2</sub> -180 | 15.29                       | 19.71                      |
| Ni <sub>3</sub> S <sub>2</sub> -200 | 13.68                       | 15.48                      |
| Ni <sub>3</sub> S <sub>2</sub> -220 | 12.81                       | 18.55                      |



## References

- [S1] X.Q. Du, P.X. Che, Y.H. Wang, C.C. Yuan, X.S. Zhang, Ni<sub>3</sub>S<sub>2</sub>@Co(OH)<sub>2</sub> heterostructures grown on Ni foam as an efficient electrocatalyst for water oxidation, *Int. J. Hydrogen Energy*, 2019, **44**, 22955-22961.
- [S2] M.Q. Yao, B.L. Sun, L.X. He, N. Wang, W.C. Hu, S. Komarneni, Self-assembled Ni<sub>3</sub>S<sub>2</sub> nanosheets with mesoporous structure tightly held on Ni foam as a highly efficient and long-term electrocatalyst for water oxidation, *ACS Sustainable Chem. Eng.*, 2019, **7**, 5430-5439.
- [S3] Y. Zhu, H.D. Yang, K. Lan, K.W. Iqbal, Y. Liu, P. Ma, Z.M. Zhao, S. Luo, Y.T. Luo, J.T. Ma, Optimization of iron-doped Ni<sub>3</sub>S<sub>2</sub> nanosheets by disorder engineering for oxygen evolution reaction, *Nanoscale*, 2019, **11**, 2355-2365.
- [S4] Q.L. Liu, L.Z. Wei, Q.C. Liu, G.L. Chen, X.K. Kong, Anion engineering on 3D Ni<sub>3</sub>S<sub>2</sub> nanosheets array toward water splitting, *ACS Appl. Energy Mater.*, 2018, **1**, 3488-3496.
- [S5] B.L. Li, Z.S. Li, Q. Pang, J.Z. Zhang, Core/shell cable-like Ni<sub>3</sub>S<sub>2</sub> nanowires/N-doped graphene-like carbon layers as composite electrocatalyst for overall electrocatalytic water splitting, *Chem. Eng. J.*, 2020, **401**, 126045.
- [S6] Q. Wu, Q.P. Gao, L.M. Sun, H.M. Guo, X.S. Tai, D. Li, L. Liu, C.Y. Ling, X.P. Sun, Facilitating active species by decorating CeO<sub>2</sub> on Ni<sub>3</sub>S<sub>2</sub> nanosheets for efficient water oxidation electrocatalysis, *Chin. J. Catal.*, 2021, **42**, 482-489.
- [S7] C.R. Wu, B.T. Liu, J. Wang, Y.Y. Su, H.Q. Yan, C.T. Ng, C. Li, J.M. Wei, 3D structured Mo-doped Ni<sub>3</sub>S<sub>2</sub> nanosheets as efficient dual-electrocatalyst for overall water splitting, *Appl. Surf. Sci.*, 2018, **441**, 1024-1033.
